# Supplementary material for: LiMn2O4 cathodes with F anion doping for superior performance of lithium-ion batteries
Source: Royal Society of Chemistry journal article supplement (doi:10.1039/d2cp02750j), 2022-01-01
Supplement: d2cp02750j1.pdf [file d2cp02750j1.pdf]

Supporting Information for Publication

**LiMn<sub>2</sub>O<sub>4</sub> Cathode with F Anions Doping for Superior Performance of Lithium-ion  
Batteries**

Zijing Wan, Xiaoxue Jiang, Dongwei Xu,<sup>\*</sup> and Xiaobing Luo

*State Key Laboratory of Coal Combustion, School of Energy and Power Engineering,  
Huazhong University of Science and Technology, Wuhan, Hubei 430074, China.*

(Dated: August 22, 2022)

---

\* correspondence to: [dwxu@hust.edu.cn](mailto:dwxu@hust.edu.cn)

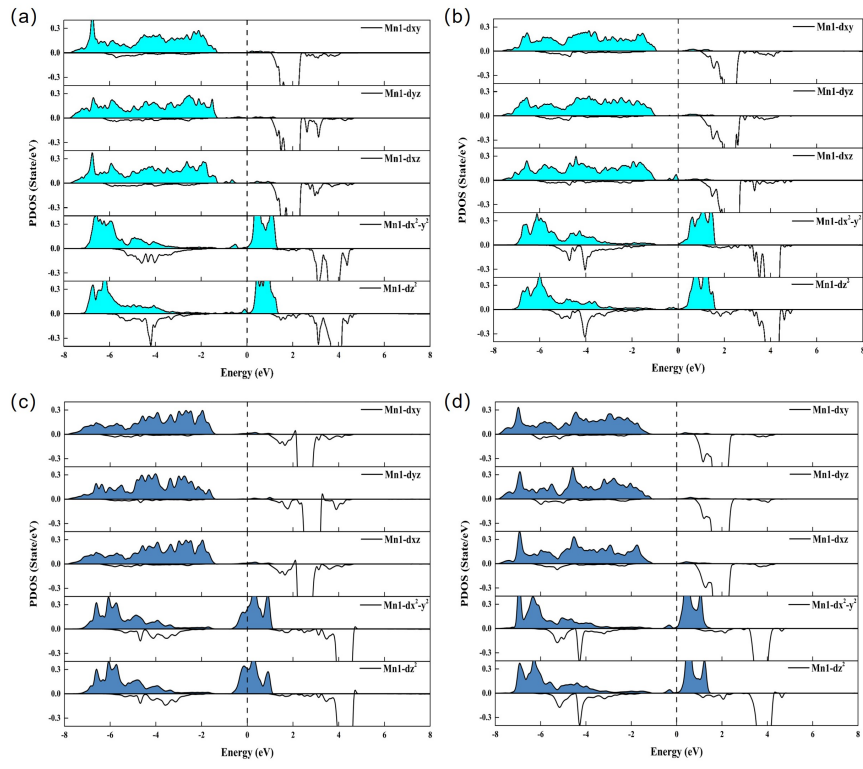

FIG. S1. PDOS of five Mn1-3d orbitals of (a-b)  $\text{Li}_x\text{Mn}_2\text{O}_{3.875}\text{F}_{0.125}$  and (c-d)  $\text{Li}_x\text{Mn}_2\text{O}_4$  in the delithiation process ( $x=0.25, 0.75$ ).

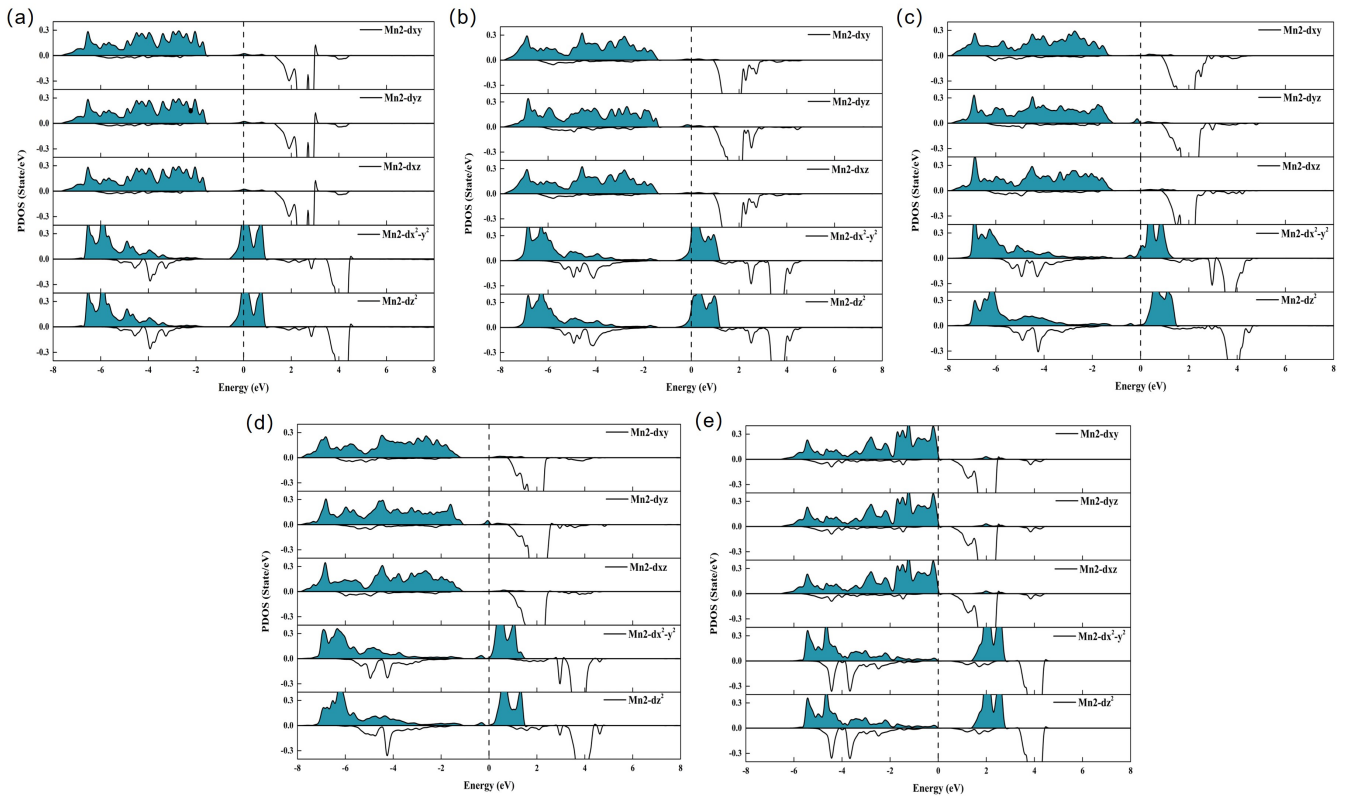

FIG. S2. (a-e) PDOS of five Mn2-3d orbitals of Li<sub>x</sub>Mn<sub>2</sub>O<sub>4</sub> in the delithiation process ( $x=0, 0.25, 0.5, 0.75, 1$ ).

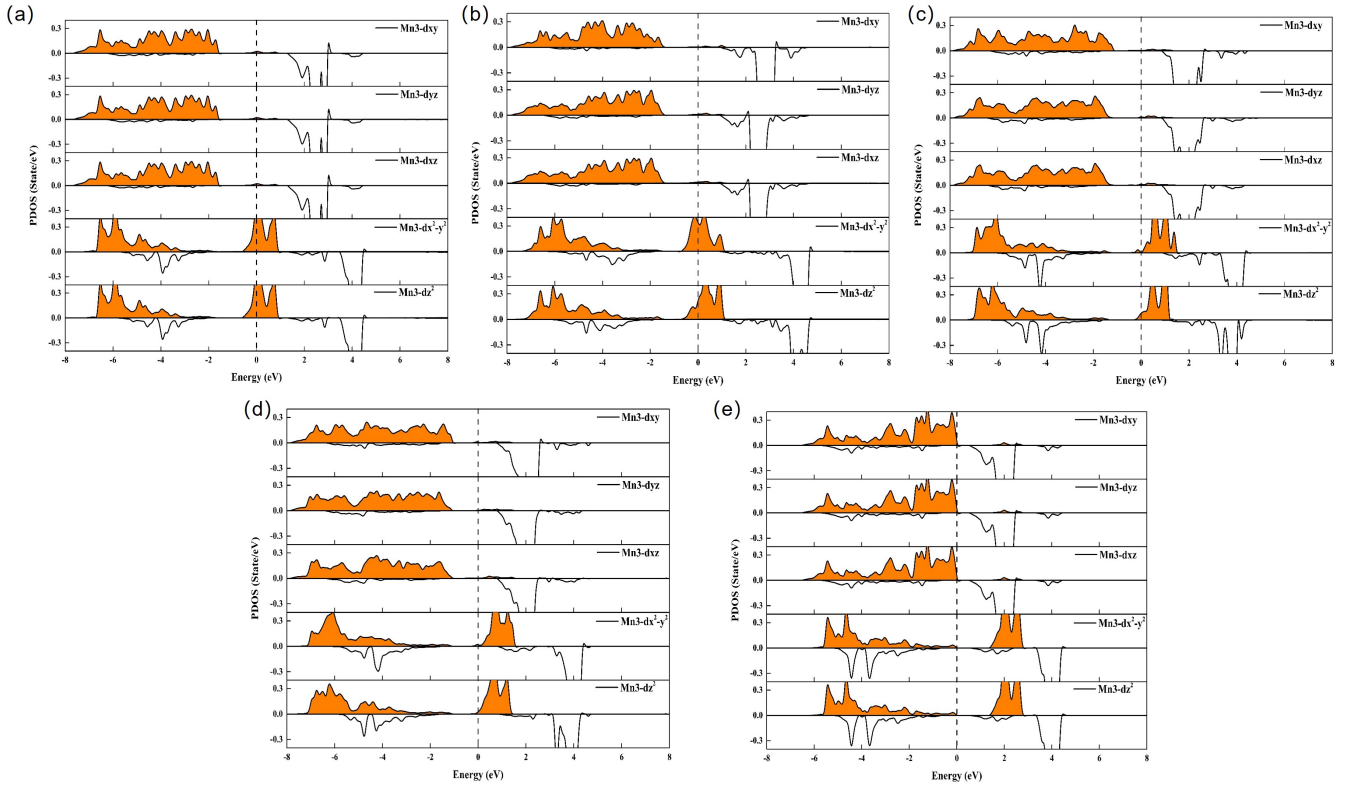

FIG. S3. (a-e) PDOS of five Mn3-3d orbitals in Li<sub>x</sub>Mn<sub>2</sub>O<sub>4</sub> in the delithiation process ( $x=0, 0.25, 0.5, 0.75, 1$ ).

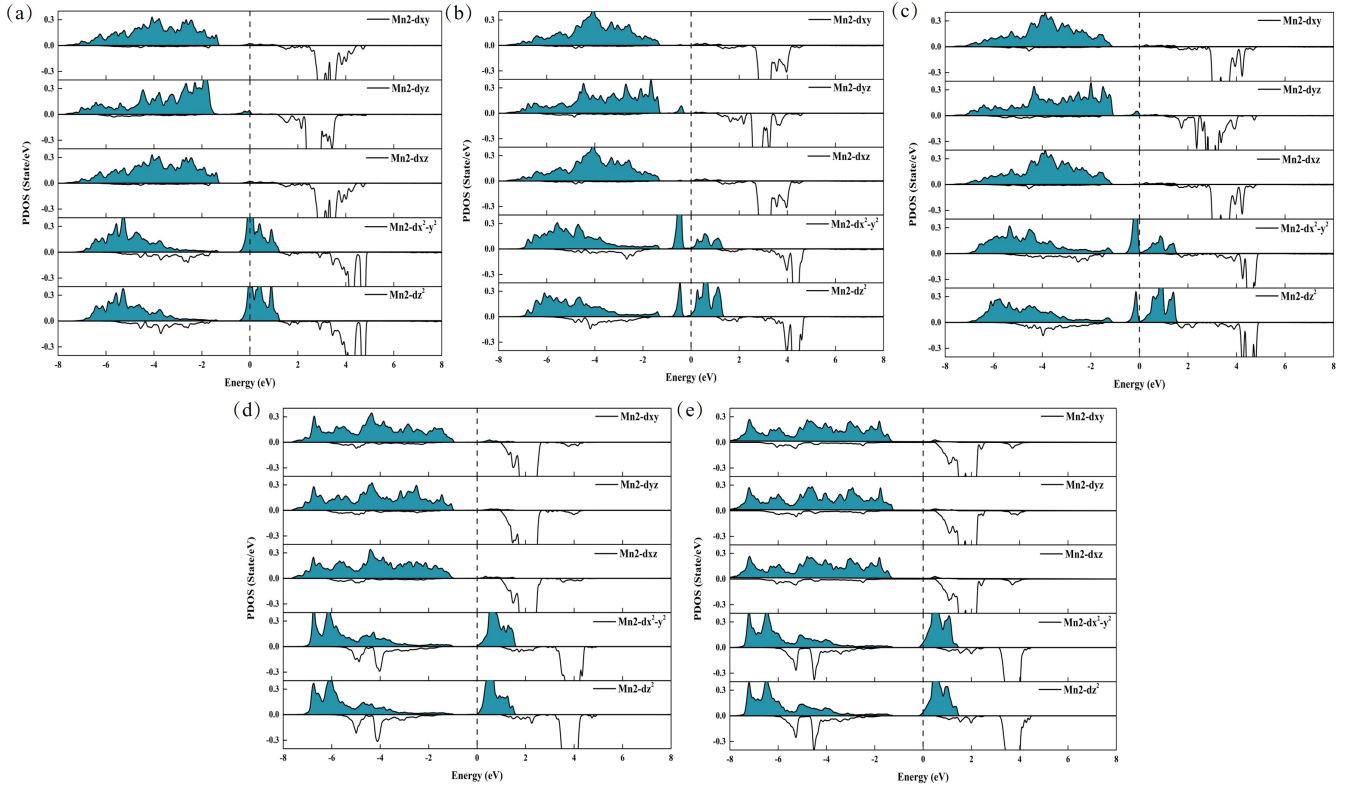

FIG. S4. (a-e) PDOS of five Mn2-3d orbitals of  $\text{Li}_x\text{Mn}_2\text{O}_{3.875}\text{F}_{0.125}$  in the delithiation process ( $x=0, 0.25, 0.5, 0.75, 1$ ).

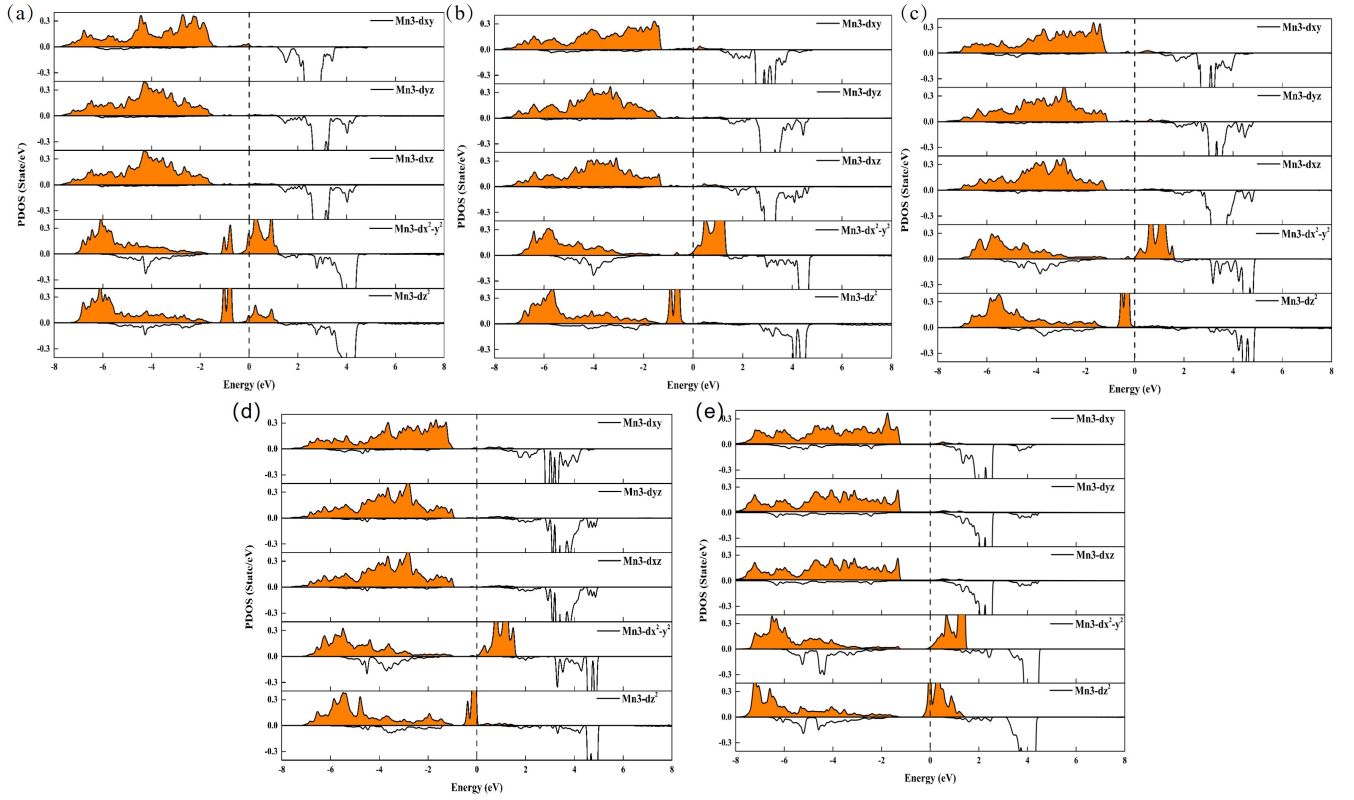

FIG. S5. (a-e) PDOS of five Mn3-3d orbitals of  $\text{Li}_x\text{Mn}_2\text{O}_{3.875}\text{F}_{0.125}$  in the delithiation process ( $x=0, 0.25, 0.5, 0.75, 1$ ).

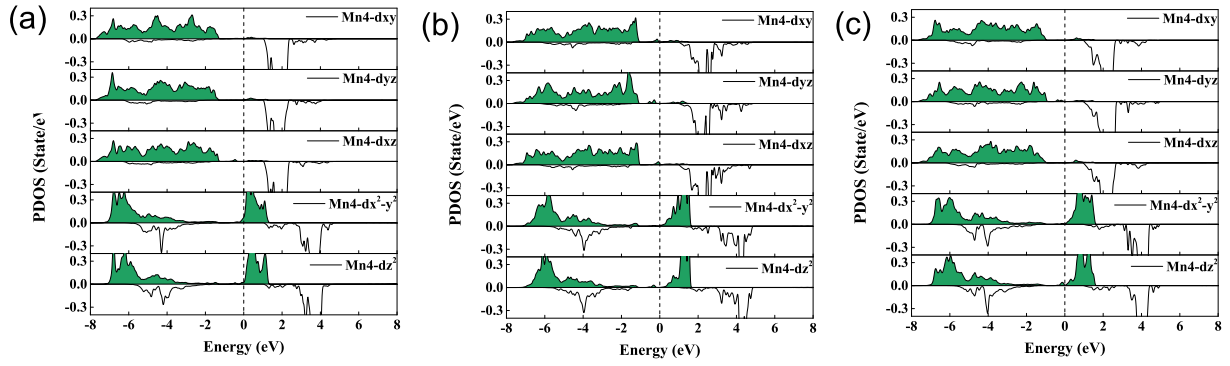

FIG. S6. (a-c)PDOS of five Mn4-3d orbitals in  $\text{Li}_x\text{Mn}_2\text{O}_{3.875}\text{F}_{0.125}$  in the delithiation process at  $x=0.75, 0.5,$  and  $0.25$ .

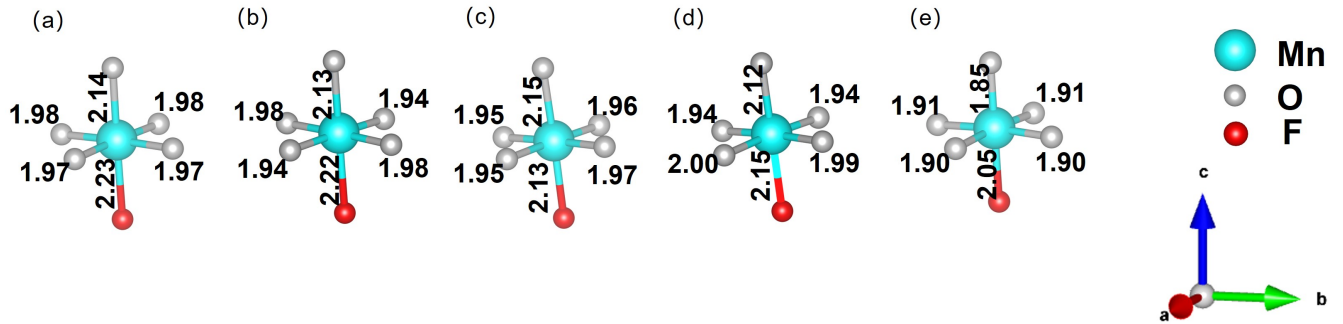

FIG. S7. (a-e) The ball and stick model of Mn3-O octahedron of  $\text{Li}_x\text{Mn}_2\text{O}_{3.875}\text{F}_{0.125}$  in the delithiation process ( $x=0, 0.25, 0.5, 0.75, 1$ ). The cyan, grey, red spheres represent Mn, O and F atoms respectively.
